# Supplementary material
Source: PubMed Central journal article supplement (PMC3111942)
Supplement: NIHMS290392-supplement-01.pdf [file NIHMS290392-supplement-01.pdf]

## FIGURE LEGENDS

### **Figure:** Hazard Ratio for Incident PAD According to Time Since Smoking Cessation

Data are hazard ratios adjusted for age, hypertension, diabetes, hypercholesterolemia, body mass index, alcohol consumption and physical activity. Current smokers represent the reference group. Error bars represent 95 percent confidence intervals. PAD = Peripheral artery disease

### **Supplementary Figure:** Cumulative Incidence for PAD According to Pack Years of Smoking

Cumulative incidence curves for symptomatic PAD according to never smokers, <10 pack years, 10-<30 pack years and  $\geq 30$  pack years of smoking exposure. PAD = Peripheral artery disease

## Symptomatic Peripheral Arterial Disease

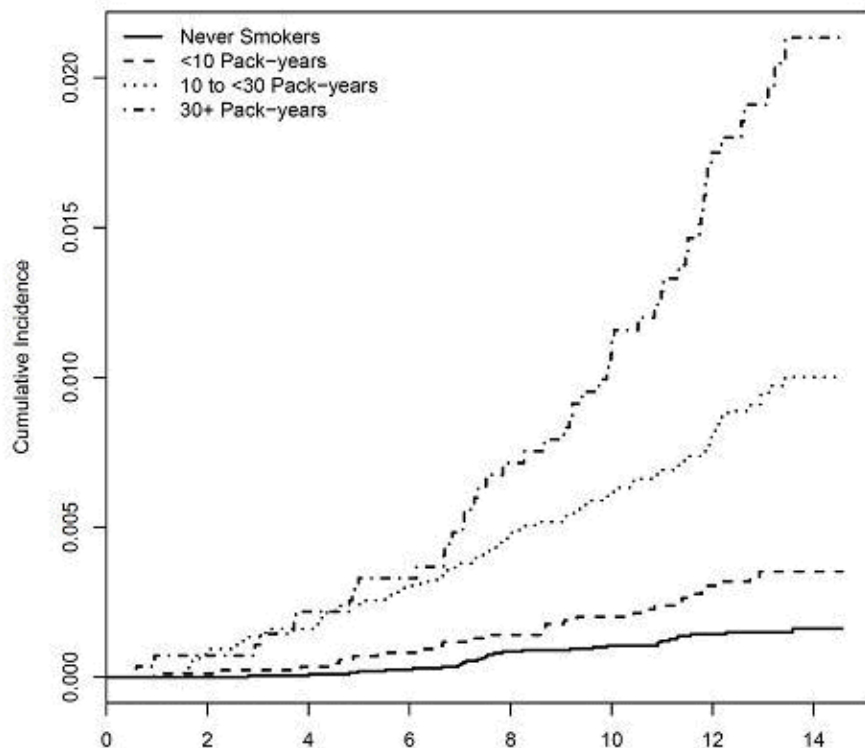

| Patients at risk     | Years |       |       |       |       |       |      |      |
|----------------------|-------|-------|-------|-------|-------|-------|------|------|
|                      | 0     | 2     | 4     | 6     | 8     | 10    | 12   | 14   |
| Never Smokers        | 20305 | 20224 | 20110 | 19934 | 19570 | 17992 | 9366 | 1037 |
| <10 Pack-years       | 8597  | 8557  | 8502  | 8409  | 8252  | 7636  | 4036 | 480  |
| 10 to <30 Pack-years | 7464  | 7407  | 7329  | 7223  | 7043  | 6438  | 6410 | 433  |
| 30+ Pack-years       | 2777  | 2731  | 2672  | 2597  | 2480  | 2216  | 1141 | 131  |

**Supplementary Table** Risk of incident peripheral arterial disease according to smoking status, classified into intermittent claudication only and undergoing invasive procedures, respectively

|                                                 | Smoking Status     |                   |                                   |                                   | <i>P</i> trend* |
|-------------------------------------------------|--------------------|-------------------|-----------------------------------|-----------------------------------|-----------------|
|                                                 | Never<br>(n=20336) | Past<br>(n=14263) | Current, <15<br>cigs/day (n=1967) | Current, ≥15<br>cigs/day (n=3259) |                 |
| Claudication Only (N=85)                        |                    |                   |                                   |                                   |                 |
| Age adjusted model<br>(n=39825)                 | 1.0 (Referent)     | 2.12 (1.25-3.93)  | 3.83 (1.53-9.61)                  | 12.72 (7.12-22.71)                | <0.001          |
| Multivariable model 1<br>(n=39803) <sup>‡</sup> | 1.0 (Referent)     | 2.22 (1.25-3.94)  | 4.03 (1.61-10.13)                 | 12.59 (7.05-22.51)                | <0.001          |
| Multivariable model 2<br>(n=38960) <sup>§</sup> | 1.0 (Referent)     | 2.32 (1.30-4.16)  | 3.45 (1.28-9.33)                  | 12.37 (6.81-22.47)                | <0.001          |
| Peripheral Artery Revascularization (N=93)      |                    |                   |                                   |                                   |                 |
| Age adjusted model<br>(n=39825)                 | 1.0 (Referent)     | 4.21 (2.13-8.34)  | 17.14 (7.95-36.99)                | 23.07 (11.62-45.79)               | <0.001          |
| Multivariable model 1<br>(n=39803) <sup>‡</sup> | 1.0 (Referent)     | 4.25 (2.15-8.42)  | 18.24 (8.45-39.41)                | 23.34 (11.75-46.36)               | <0.001          |
| Multivariable model 2<br>(n=38960) <sup>§</sup> | 1.0 (Referent)     | 4.70 (2.30-9.62)  | 19.25 (8.57-43.25)                | 25.64 (12.44-52.87)               | <0.001          |

\* *P* for trend across categories of cigarette exposure

† Incidence rates are per 1000 person-years of observation

‡ Additionally adjusted for history of hypertension, history of diabetes, and history of hypercholesterolemia

§ Additionally adjusted for body mass index, alcohol consumption, and physical activity
